# Supplementary material
Source: PubMed Central journal article supplement (PMC2736337)
Supplement: NIHMS134644-supplement-1_si_001.pdf [file NIHMS134644-supplement-1_si_001.pdf]

## SUPPORTING INFORMATION

### Oligomerization Route to Py-Im Polyamide Macrocycles

David M. Chenoweth, Daniel A. Harki, and Peter B. Dervan\*

Division of Chemistry and Chemical Engineering, California Institute of Technology, Pasadena, CA 91125

#### Table of Contents for Supporting Information

|                                                                                                                                                                                      | <b><u>Page</u></b> |
|--------------------------------------------------------------------------------------------------------------------------------------------------------------------------------------|--------------------|
| General experimental procedures                                                                                                                                                      | S2                 |
| Preparation of BocHN-( <i>R</i> ) <sup>β-CbzHN</sup> <sub>γ</sub> -ImPyPyPy-CO <sub>2</sub> Pfp ( <b>4</b> )                                                                         | S2                 |
| Oligomerization reaction (preparation of <b>1</b> , <b>2</b> , and <b>3</b> )                                                                                                        | S3                 |
| UV melting temperature analysis                                                                                                                                                      | S3                 |
| References                                                                                                                                                                           | S4                 |
| <sup>1</sup> H NMR of BocHN-( <i>R</i> ) <sup>β-CbzHN</sup> <sub>γ</sub> -ImPyPyPy-CO <sub>2</sub> Pfp ( <b>4</b> )                                                                  | S5                 |
| <sup>1</sup> H NMR of <i>cyclo</i> -(-ImPyPyPy-( <i>R</i> ) <sup>β-H<sub>2</sub>N</sup> <sub>γ</sub> -ImPyPyPy-( <i>R</i> ) <sup>β-H<sub>2</sub>N</sup> <sub>γ</sub> -) ( <b>1</b> ) | S6                 |
| Figure S1 (Reverse phase HPLC analysis of oligomerization reaction)                                                                                                                  | S7                 |
| Figure S2 DNA binding model for compounds <b>1</b> , <b>2</b> , and <b>3</b>                                                                                                         | S8                 |

**General.** Chemicals were purchased from Sigma-Aldrich and were used without further purification. (*R*)-3,4-Cbz-Dbu(Boc)-OH was purchased from Senn Chemicals AG (code number 44159). Bulk grade solvents were from Fisher Scientific. Analytical HPLC analysis was conducted on a Beckman Gold instrument equipped with a Phenomenex Gemini analytical column (250 × 4.6 mm, 5 μm), a diode array detector, and the mobile phase consisted of a gradient of acetonitrile (MeCN) in 0.1% (v/v) aqueous CF<sub>3</sub>CO<sub>2</sub>H. Preparative HPLC was performed on an Agilent 1200 system equipped with a solvent degasser, diode array detector, and a Phenomenex Gemini column (250 × 21.2 mm, 5 μm). A gradient of MeCN in 0.1% (v/v) aqueous CF<sub>3</sub>CO<sub>2</sub>H was utilized as the mobile phase. NMR spectroscopy was performed on a Varian instrument operating at 499.8 MHz (for <sup>1</sup>H) at ambient temperature. All NMR analyses were performed in DMSO-*d*<sub>6</sub>, and chemical shifts are reported in parts per million relative to the internal solvent peak referenced to 2.49 (for <sup>1</sup>H). High-resolution mass spectrometry (HRMS) was recorded in positive-ion mode by fast-atom bombardment (FAB<sup>+</sup>) on a JOEL JMS-600H instrument or by matrix-assisted, LASER desorption/ionization time-of-flight mass spectrometry (MALDI-TOF MS) on an Applied Biosystems Voyager DE-Pro spectrometer using α-cyano-4-hydroxycinnamic acid as matrix.

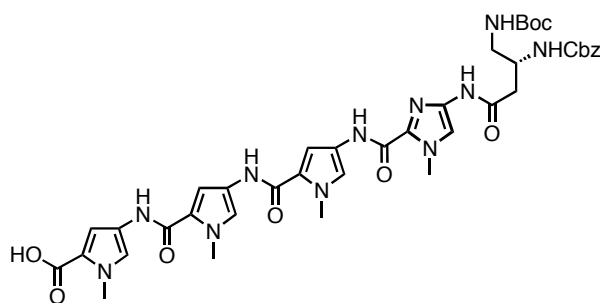

**BocHN-(*R*)<sup>β</sup>-CbzHN<sup>γ</sup>-ImPyPyPy-CO<sub>2</sub>H.** Synthesized as previously described.<sup>1</sup>

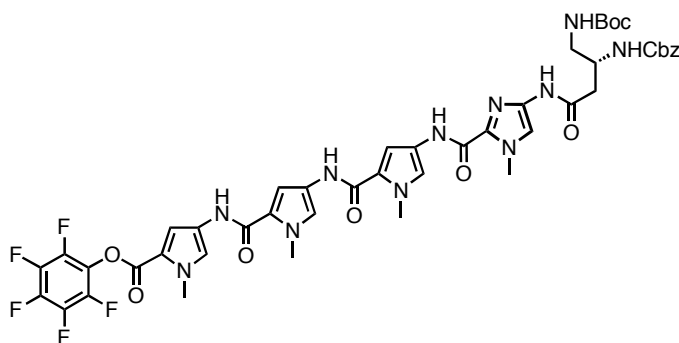

**BocHN-(*R*)<sup>β</sup>-CbzHN<sup>γ</sup>-ImPyPyPy-CO<sub>2</sub>Pfp (4).** A solution of BocHN-(*R*)<sup>β</sup>-CbzHN<sup>γ</sup>-ImPyPyPy-CO<sub>2</sub>H (100 mg, 0.119 mmol) and DCC (49 mg, 0.238 mmol) in CH<sub>2</sub>Cl<sub>2</sub> (5.2 mL) was stirred at 23 °C for 45 min. The solution was then treated with DMAP (1.4 mg, 0.012 mmol) followed by pentafluorophenol (131.2 mg, 0.713 mmol) and stirred at 23 °C for 12 h. The reaction mixture was then loaded onto a silica gel column with CH<sub>2</sub>Cl<sub>2</sub> and eluted with step gradients of 100%

CH<sub>2</sub>Cl<sub>2</sub> to 100% acetone with incremental steps of 5% acetone. The product was concentrated *in vacuo* to yield BocHN-(*R*)<sup>β</sup>-CbzHN<sup>γ</sup>-ImPyPyPy-CO<sub>2</sub>Pfp **4** as an off-white solid (84 mg, 71%). <sup>1</sup>H NMR (500 MHz, DMSO-*d*<sub>6</sub>): δ 10.16 (s, 1H), 10.08 (s, 1H), 9.99 (s, 1H), 9.97 (s, 1H), 7.74 (d, *J* = 1.8 Hz, 1H), 7.44 (s, 1H), 7.33 – 7.30 (m, 5H), 7.29 (d, *J* = 1.9 Hz, 1H), 7.27 (d, *J* = 1.8 Hz, 1H), 7.25 (d, *J* = 1.8 Hz, 1H), 7.14 (d, *J* = 1.8 Hz, 1H), 7.13 (d, *J* = 1.8 Hz, 1H), 7.03 (d, *J* = 8.4 Hz, 1H), 6.80 (t, *J* = 5.8 Hz, 1H), 4.98 (s, 2H), 3.95 (m, 4H), 3.89 (s, 3H), 3.860 (s, 3H), 3.856 (s, 3H), 3.03 (m, 2H), 2.46 (m, 2H), 1.36 (s, 9H). HRMS (FAB<sup>+</sup>) calc'd for C<sub>46</sub>H<sub>47</sub>N<sub>11</sub>O<sub>10</sub>F<sub>5</sub> [M+H]<sup>+</sup> 1008.343, found 1008.342.

**Oligomerization procedure.** A glass vial (1 dram) was charged with **4** (5.0 mg, 4.96 μmole) and treated with a solution of CF<sub>3</sub>CO<sub>2</sub>H in CH<sub>2</sub>Cl<sub>2</sub> (1:1 CF<sub>3</sub>CO<sub>2</sub>H:CH<sub>2</sub>Cl<sub>2</sub>, 1 mL) and stirred at 23 °C for 10 min. The solvent was removed *in vacuo* and the residual solid was dried under high vacuum for 20 min. The solid was diluted with DMSO (500 μL) followed by DIEA (80 μL) and the solution was stirred at 23 °C for 20 hr. After 20 hr the reaction was complete by analytical HPLC analysis. The reaction was diluted to a final volume of 10 mL by addition of a solution of DMF in aqueous CF<sub>3</sub>CO<sub>2</sub>H (2:3 DMF:0.1% aqueous CF<sub>3</sub>CO<sub>2</sub>H). NOTE: A small amount of yellow insoluble material was observed and discarded. Purification by RP-HPLC (a gradient of 20% to 100% MeCN in 0.1% (v/v) aqueous CF<sub>3</sub>CO<sub>2</sub>H was utilized as the mobile phase) yielded **1z** (13.9 % yield), **2z** (5.5 % yield), and **3z** (2.1 % yield). The yield of **1z** is calculated from the mass of the purified and isolated material (0.5 mg). Yields for **2z** and **3z** were calculated based on **1z** using the relative product distribution as measured by integration of the preparative HPLC chromatogram at 310 nm (product distribution: 6.6:2.6:1.0 ratio of **1z**:**2z**:**3z**; UV integral values were normalized to the number of ImPyPyPy strands contained in each cyclic oligomer). The benzyl carbamate (Cbz) protecting groups of **1z-3z** were removed as previously described<sup>2</sup> and compounds **1**, **2**, and **3** were purified as described for compound **1**.<sup>2</sup> Characterization data for dimer **1** has been reported previously.<sup>1</sup> Dimer **1** <sup>1</sup>H NMR (500 MHz, DMSO-*d*<sub>6</sub>): δ 10.56 (s, 2H), 9.91 (s, 4H), 9.88 (s, 2H), 8.17 (t, *J* = 5.6 Hz, 2H), 7.96 (m, 6H), 7.40 (s, 2H), 7.31 (d, *J* = 1.6 Hz, 2H), 7.27 (d, *J* = 1.6 Hz, 2H), 7.19 (d, *J* = 1.6 Hz, 2H), 7.00 (d, *J* = 1.7 Hz, 2H), 6.96 (d, *J* = 1.6 Hz, 2H), 6.94 (d, *J* = 1.7 Hz, 2H), 3.94 (s, 6H), 3.83 (s, 12H), 3.80 (s, 6H), 3.71-3.66 (m, 2H), 3.49-3.27 (m, 4H, partially obstructed by H<sub>2</sub>O peak), 2.79 (dd, *J* = 16.1 Hz, 6.0 Hz, 2H), 2.60 (dd, *J* = 15.2 Hz, 5.2 Hz, 2H); UV-vis (H<sub>2</sub>O) λ<sub>max</sub> (ε): 312 nm (55540). Trimer **2** HRMS (MALDI-TOF) calc'd for C<sub>81</sub>H<sub>94</sub>N<sub>33</sub>O<sub>15</sub> [M+H]<sup>+</sup> 1768.7607, found 1768.7566; UV-vis (H<sub>2</sub>O) λ<sub>max</sub> (ε): 312 nm (83310). Tetramer **3** HRMS (MALDI-TOF) calc'd for C<sub>108</sub>H<sub>125</sub>N<sub>44</sub>O<sub>20</sub> [M+H]<sup>+</sup> 2358.0112, found 2358.0143; UV-vis (H<sub>2</sub>O) λ<sub>max</sub> (ε): 312 nm (111080).

**UV Absorption Spectrophotometry.** Melting temperature analysis was performed on a Varian Cary 100 spectrophotometer equipped with a thermo-controlled cell holder possessing a cell path length of 1 cm. A degassed aqueous solution of 10 mM sodium cacodylate, 10 mM KCl, 10 mM MgCl<sub>2</sub>, and 5 mM CaCl<sub>2</sub> at pH 7.0 was used as analysis buffer. DNA duplexes and hairpin polyamides were mixed in 1:1 stoichiometry to a final concentration of 2 μM for each experiment. Prior to analysis, samples were heated to 90 °C and cooled to a starting temperature of 25 °C with a heating rate of 5 °C/min for each ramp. Denaturation profiles were recorded at λ = 260 nm from 25 °C to 90 °C with a heating rate of 0.5 °C/min. The reported melting temperatures were defined as the maximum of the first derivative of the denaturation profile.

## References

- (1) Chenoweth, D. M.; Harki, D. A.; Phillips, J. W.; Dose, C.; Dervan, P. B. *J. Am. Chem. Soc.* **2009**, *131*, 7182-7188.
- (2) Dose, C.; Farkas, M. E.; Chenoweth, D. M.; Dervan, P. B. *J. Am. Chem. Soc.* **2008**, *130*, 6859-6866.

Solvent dmso  
Acquisition Date 2009-03-31T07:02:55  
Temperature 25.0  
Number of Scans 64  
Spectrometer Frequency 499.76  
Nucleus <sup>1</sup>H

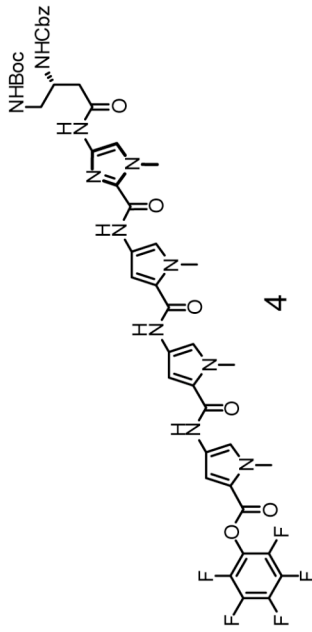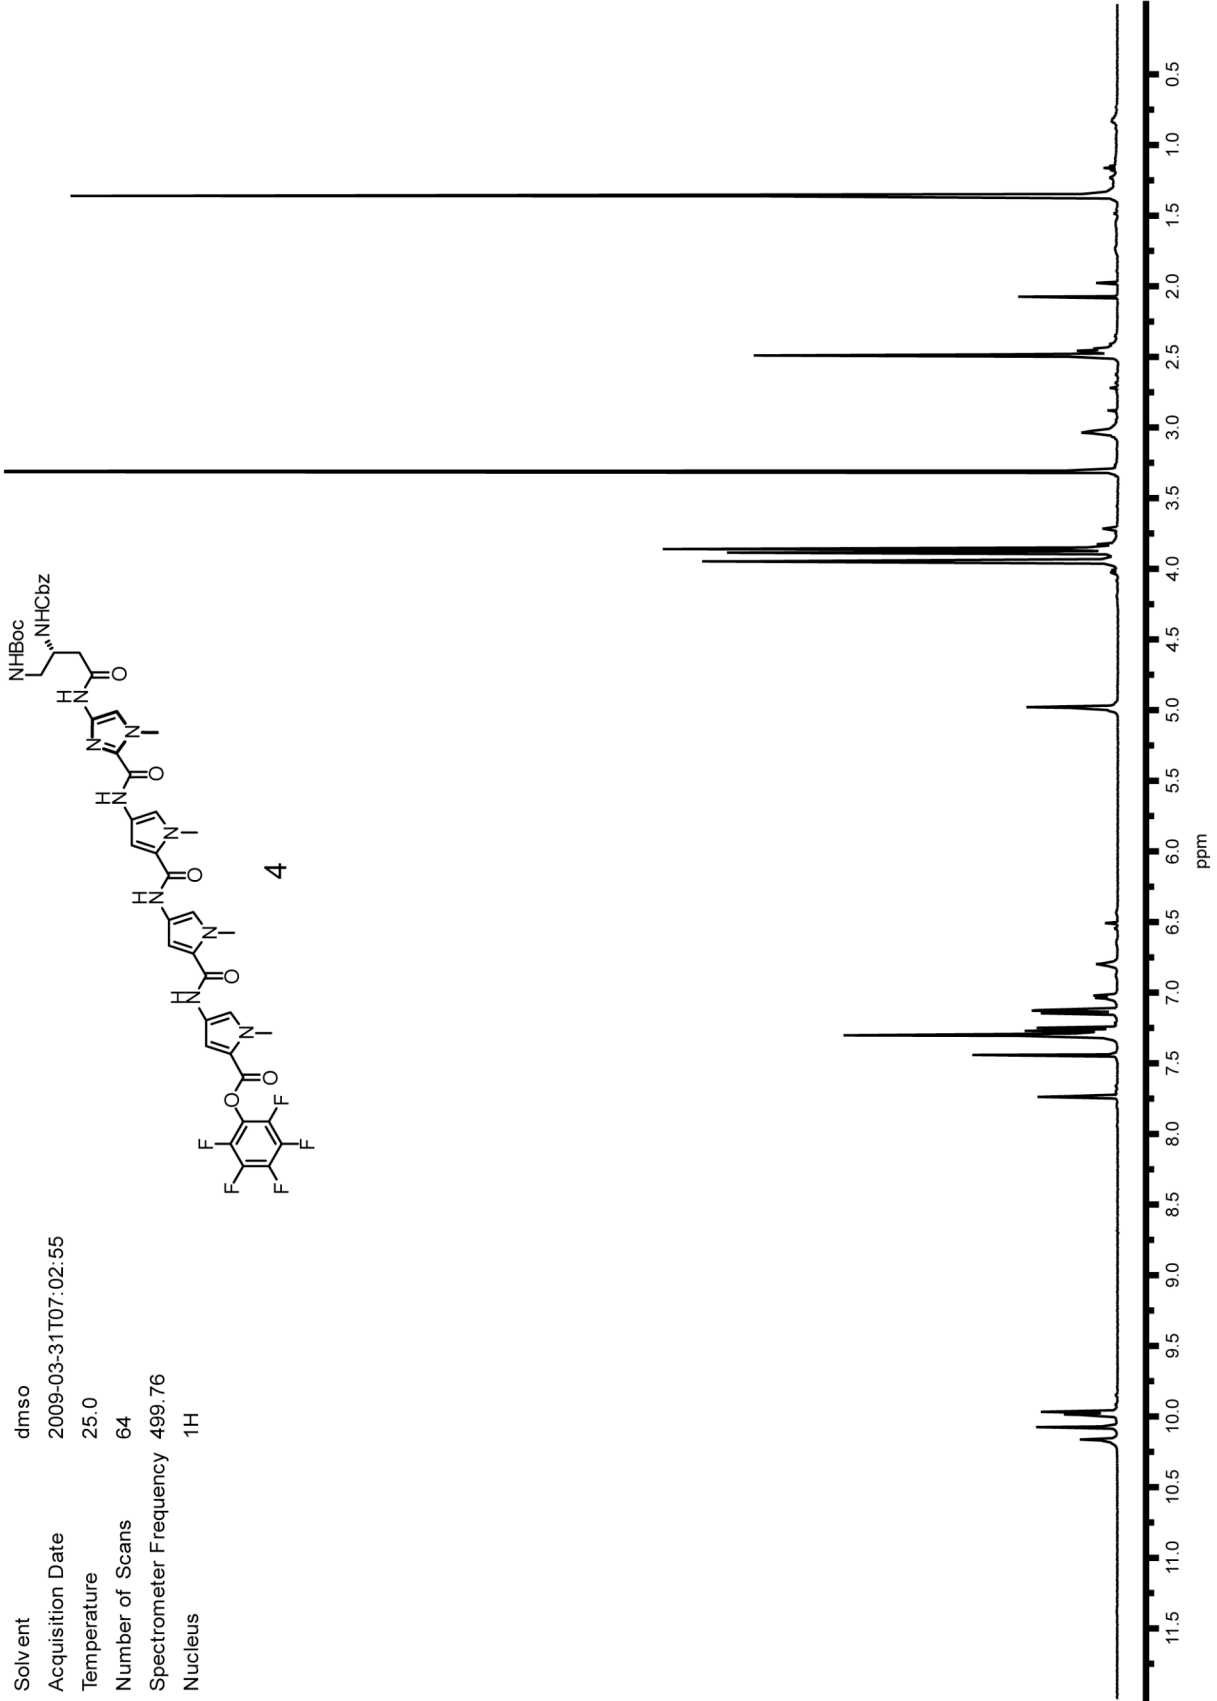

exp3 Proton

```

SAMPLE              SPECIAL   25.0
date  Jan 20 2009   temp      not used
solvent dms0
file/home/au3/200~ gain
r3s/data/3200-f00~ h50  0.068
3.01.18/3200-fid  pw50  9.908
ACQUISITION      alfa  6.600
sw  8000.0
at  800.48  il  n
rp  52762  in  n
fb  not used dp  y
bs  32  hs  PROCESSING  nn
ss  1.000  lb  0.20
dl  800  fh  65536
nt  ct  DISPLAY  -8.0
tn  TRANSMITTER  H1  wp  6008.8
sfrq  499.772  rfl  2248.0
tof  499.6  rfp  1244.4
tpwr  61  rp  142.2
pw  4.950  lp  -0.2
DECOUPLER  C13  wc  250
dn  0  sc  0
dm  nnn  vs  1009
dmm  c  th  1
dpwr  35  ai  cdc  ph
dmf  32258

```

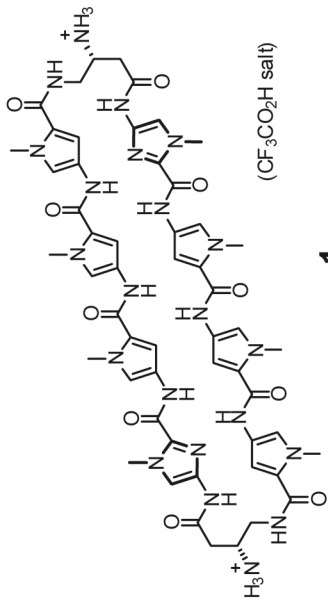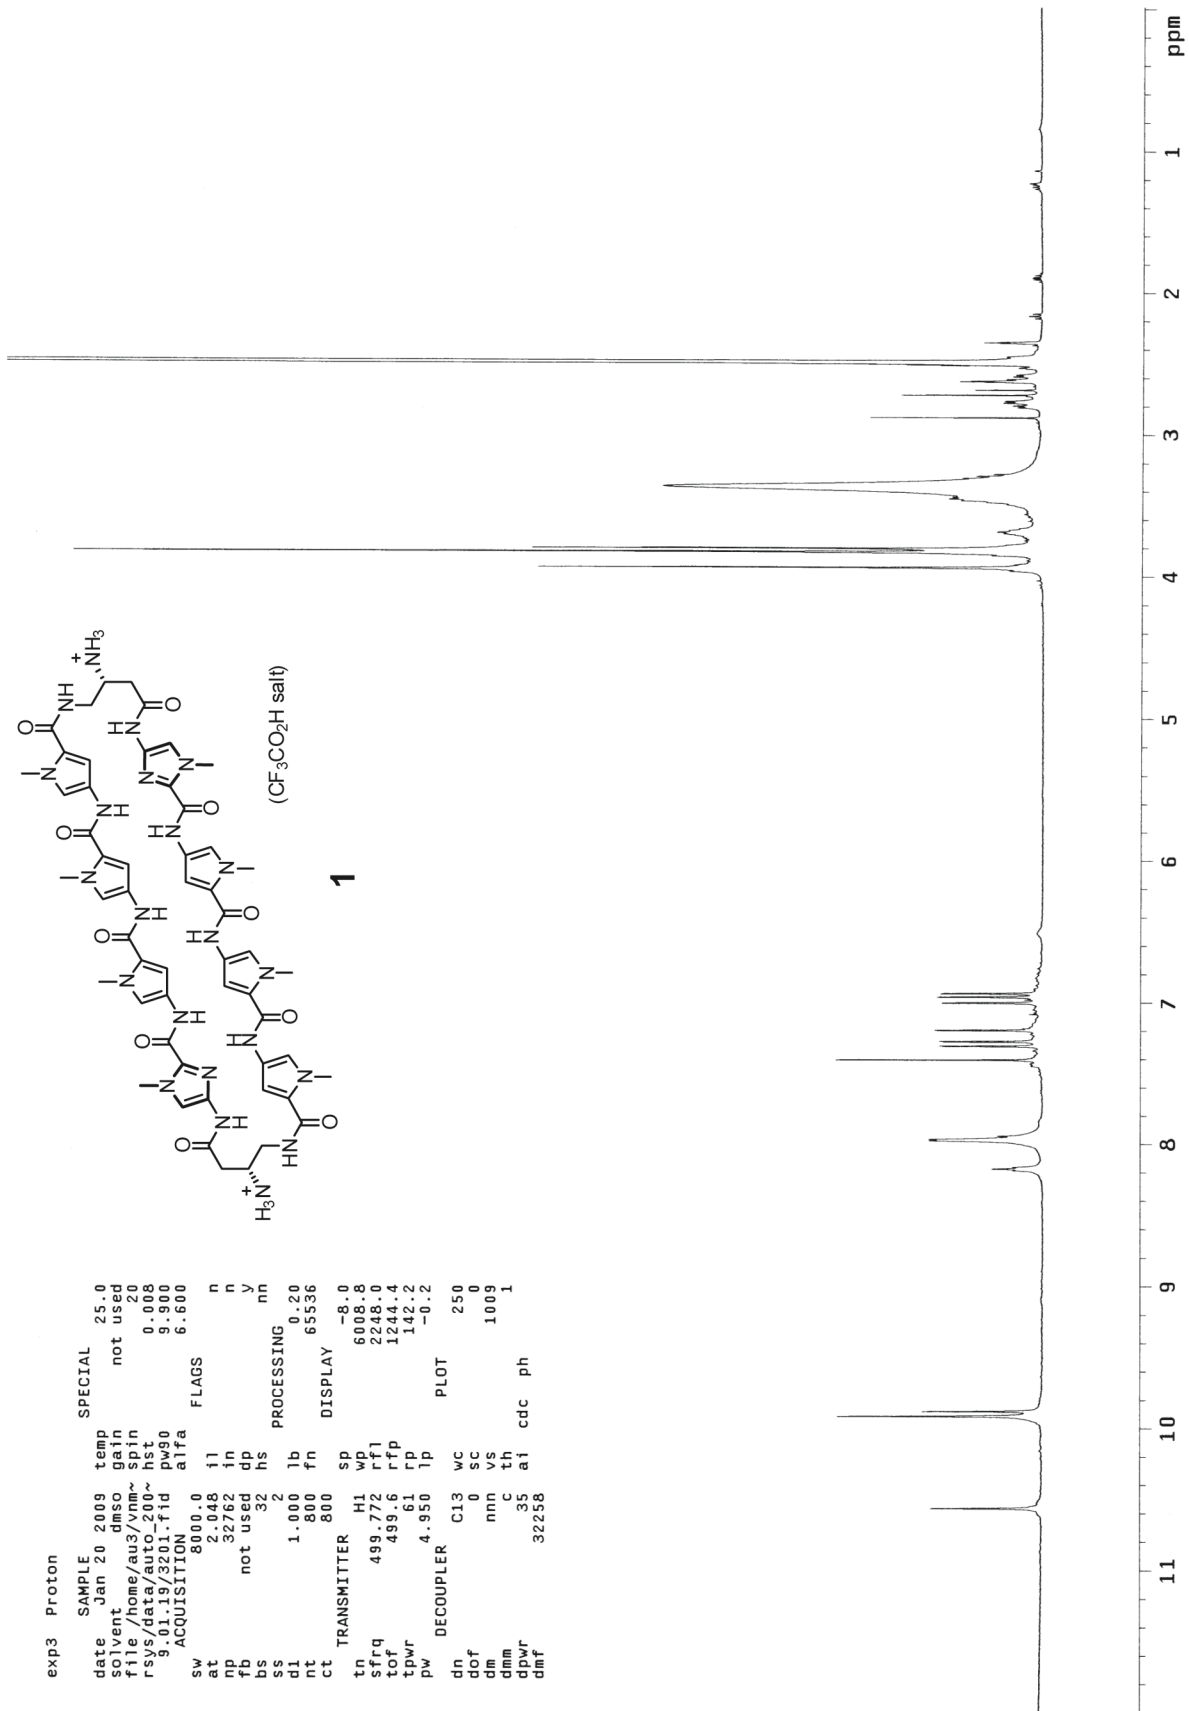

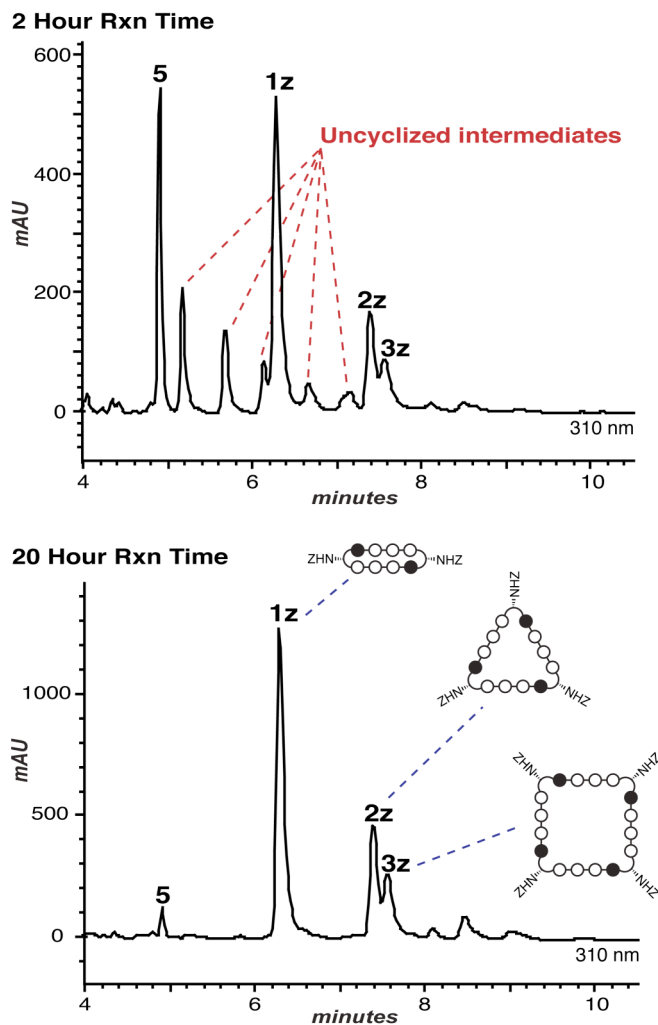

**Figure S1.** (Top) Reverse phase HPLC analysis (2 hr) of the oligomerization reaction showing starting material **5**, macrocycle products **1z**, **2z**, **3z**, and reaction intermediates. (Bottom) Analysis (20 hr) of the oligomerization reaction revealing products **1z**, **2z**, **3z**, and the consumption of starting material **5** and reaction intermediates. Peaks were identified by high-resolution mass spectrometry following isolation and Cbz-deprotection.

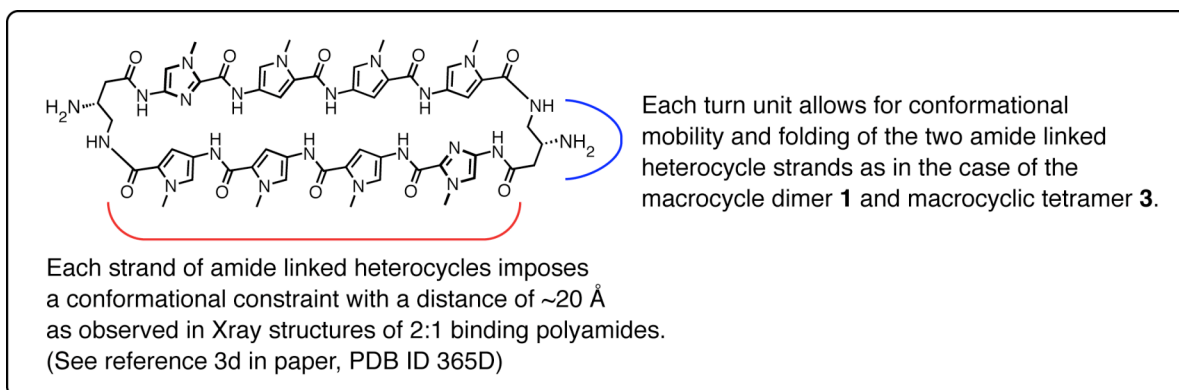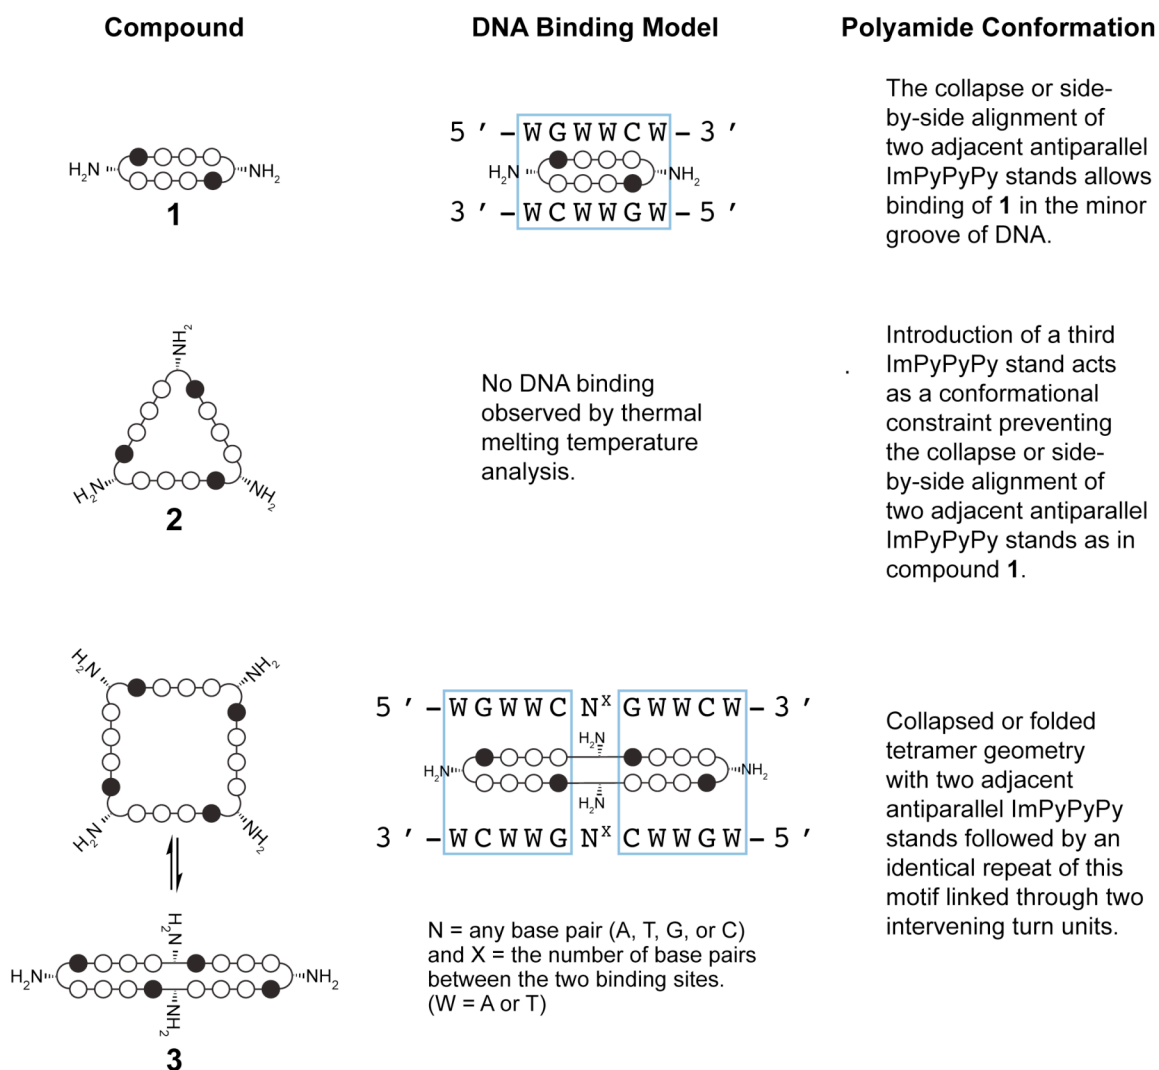

**Figure S2.** (Top) Anatomy of a polyamide macrocycle showing constrained heterocyclic strands and flexible linker regions. (Bottom) Proposed DNA binding models and macrocycle conformation for polyamides **1**, **2**, and **3**.
